# Supplementary material for: Sex Differences in Circadian Clock Genes and Myocardial Infarction Susceptibility
Source: MDPI journal article supplement (doi:10.3390/jcdd8050053), 2021-05-08
Supplement: s1 [file s1]

Supplementary Material

**Table S1:** Frequencies and distribution of probable haplotypes in the women and men.

| Gene         | rs3789327  | rs4757144 | rs12363415 | Frequency women | Frequency men | p value          |
|--------------|------------|-----------|------------|-----------------|---------------|------------------|
| <i>ARNTL</i> | T          | A         | A          | 0.43            | 0.45          | 0.67             |
|              | C          | A         | A          | 0.17            | 0.14          | 0.72             |
|              | C          | G         | G          | 0.08            | 0.09          | 0.75             |
|              | C          | G         | A          | 0.19            | 0.11          | <b>0.03</b>      |
|              | T          | G         | A          | 0.09            | 0.15          | 0.13             |
| <i>CLOCK</i> | rs11932595 | rs6811520 | rs13124436 |                 |               |                  |
| <i>CLOCK</i> | A          | T         | G          | 0.40            | 0.34          | 0.26             |
|              | G          | C         | A          | 0.11            | 0.13          | 0.61             |
|              | G          | C         | G          | 0.22            | 0.26          | 0.33             |
|              | A          | C         | G          | 0.05            | 0.05          | 0.94             |
|              | A          | C         | A          | 0.19            | 0.19          | 0.99             |
| <i>CRY2</i>  | rs2292912  |           | rs10838524 |                 |               |                  |
| <i>CRY2</i>  | G          |           | A          | 0.25            | 0.25          | 0.92             |
|              | C          |           | A          | 0.20            | 0.19          | 0.88             |
|              | G          |           | G          | 0.00            | 0.01          | <b>&lt;0.001</b> |
| <i>PER2</i>  | rs35333999 |           | rs934945   |                 |               |                  |
| <i>PER2</i>  | C          |           | C          | 0.77            | 0.78          | 0.81             |
|              | C          |           | T          | 0.18            | 0.17          | 0.72             |
|              | T          |           | C          | 0.05            | 0.05          | 0.94             |
